# Supplementary material
Source: PubMed Central journal article supplement (PMC5368050)
Supplement: BPH-174-718-s001.pdf [file BPH-174-718-s001.pdf]

2016-BJP-0574-RP.R1

## Online Supporting information

## Role of inducible nitric oxide synthase in endothelium-independent relaxation to raloxifene in rat aortas

Chi Ming Wong<sup>a,b,c\*</sup>, Chak Leung Au<sup>c</sup>, Suk Ying Tsang<sup>d</sup>, Chi Wai Lau<sup>c</sup>, Xiaoqiang Yao<sup>c</sup>, Zongwei Cai<sup>a,b</sup>, Arthur Chi-Kong Chung<sup>a,b\*</sup>

<sup>a</sup> Partner State Key Laboratory of Environmental and Biological Analysis and Department of Chemistry, Hong Kong Baptist University (HKBU), Hong Kong, China

<sup>b</sup> HKBU Institute for Research and Continuing Education, Shenzhen, China

<sup>c</sup> School of Biomedical Sciences, Chinese University of Hong Kong, Hong Kong, China

<sup>d</sup> School of Life Sciences, Chinese University of Hong Kong, Hong Kong, China

Running title: Inducible nitric oxide synthase in raloxifene-induced vasorelaxation

## FIGURE LEGENDS FOR ONLINE SUPPORTING INFORMATION

Figure S1. A, Concentration-dependent inhibition of U46619-induced contractions in endothelium-intact rat aortic rings by raloxifene (Rf) (n=6-8). B, pEC<sub>50</sub> values for U46619-induced contraction in the absence and presence of raloxifene (0.1-10 μM, n=6-8). C, Similar inhibitory effects of 1 μM raloxifene on U46619-contracted endothelium-intact (+Endo) and -denuded aortic rings (-Endo) (n=7-9). D, pEC<sub>50</sub> values obtained in (C). Concentration-response curves for U46619-induced contractile responses in rat endothelium-intact aortic rings. Raloxifene reduced the U46619 contraction in the absence and presence of 100 μM L-NAME (E) or 3 μM ODQ (G). Results are mean ± SEM of 6-9 rings from different rats. F & H, pEC<sub>50</sub> values obtained in E & G. Contractions were normalized as percentage of 60 mM K<sup>+</sup>-induced tension. Statistical differences are indicated by between different treatment groups (\*

P < 0.05, \*\* P < 0.01, \*\*\* P < 0.001). NS indicates no significant difference.

Figure S2. The steady-state maximum relaxation to raloxifene (Rf, 1  $\mu$ M) in the U46619-contracted endothelium-intact (+endo) and endothelium-denuded (-endo) aortic rings. Statistical differences (P < 0.001) are indicated by <sup>a</sup> between vehicle control and raloxifene group in endothelium-intact rings, and <sup>b</sup> between vehicle control and raloxifene group in endothelium-denuded rings. Results are mean  $\pm$  SEM of 6-7 rings from different rats.

Figure S3. A, Recordings showing time-dependent relaxant responses to 10  $\mu$ g/ml LPS in endothelium-denuded aortic rings in control and in the presence of 1  $\mu$ M ICI 182,780. B, No inhibitory effects of ICI 182,780 on LPS-induced aortic relaxation. C, The maximal relaxant effect of LPS in the absence and presence of ICI 182,780. Statistical differences are indicated by \*\* (P < 0.01) or \*\*\* (P < 0.001) between vehicle control and treatment groups. Results are mean  $\pm$  SEM of 6 rings from different rats. NS indicates no significant difference.

Figure S4. A, Recordings showing time-dependent relaxant responses to 10  $\mu$ g/ml LPS in endothelium-denuded aortic rings in control and in the presence of 3  $\mu$ M PDTC. B, Inhibitory effects of PDTC on LPS-induced aortic relaxation. C, The maximal relaxant effect of LPS in the absence and presence of PDTC. Statistical differences are indicated by \*\*\* (P < 0.001) between vehicle control and LPS group, and <sup>a</sup> (P < 0.05) between LPS and treatment group. Results are mean  $\pm$  SEM of 6 rings from different rats.

Figure S5. A, Inhibitory effects of 100  $\mu$ M L-NAME or 100  $\mu$ M AMT-HCl on LPS (10  $\mu$ g/ml)-induced relaxation. B, Inhibitory effect of 10  $\mu$ M actinomycin D or 10  $\mu$ M cycloheximide on LPS-induced relaxation. C, The maximal relaxant effect of LPS in the absence and presence of L-NAME, AMT-HCl, actinomycin D and cycloheximide. Statistical differences are indicated by \*\*\* (P < 0.001) between vehicle control and LPS group, and <sup>a</sup> (P < 0.05) between LPS and other treatment groups. These experiments were performed on endothelium-denuded aortic rings. Results are mean  $\pm$  SEM of 5-6 rings from different rats.

Figure S6. Comparison of relaxations induced by 1  $\mu$ M raloxifene (A) and 100 nM SNP (B) in endothelium-denuded aortic rings following different pharmacological treatments. Statistical differences are indicated by \* (P < 0.001) between control and treatment groups. Results are mean  $\pm$  SEM of 6-11 rings from different rats.

Figure S7. A, The time-course for the relaxant response induced by raloxifene (1  $\mu\text{M}$ ),  $17\beta$ -estradiol (E2, 1 and 10  $\mu\text{M}$ ) and tamoxifen (Tam, 1 and 10  $\mu\text{M}$ ) in the U46619-contracted endothelium-denuded aortic rings. B, The steady-state maximum relaxation to raloxifene,  $17\beta$ -estradiol and tamoxifen. Statistical differences are indicated by between vehicle control and other treatment groups (\*\*\*) ( $P < 0.001$ ). Results are mean  $\pm$  SEM of 5-6 rings from different rats. NS indicates no significant difference.

Figure S8. A, Inhibitory effects of 100  $\mu\text{M}$  AMT-HCl or 10  $\mu\text{M}$  cycloheximide on  $17\beta$ -estradiol (10  $\mu\text{M}$ )-induced relaxation in the U46619-contracted endothelium-denuded aortic rings. B, The maximal relaxant effect of  $17\beta$ -estradiol in the absence and presence of AMT-HCl and cycloheximide. C, Inhibitory effect of 100  $\mu\text{M}$  AMT-HCl or 10  $\mu\text{M}$  cycloheximide on tamoxifen (10  $\mu\text{M}$ )-induced relaxation. D, The maximal relaxant effect of tamoxifen in the absence and presence of AMT-HCl and cycloheximide. Statistical differences are indicated by \*\*\* ( $P < 0.001$ ) between vehicle control and  $17\beta$ -estradiol or tamoxifen group, and <sup>a</sup> ( $P < 0.05$ ) between  $17\beta$ -estradiol or tamoxifen and other treatment groups. Results are mean  $\pm$  SEM of 5-6 rings from different rats.
