# Supplementary material
Source: PubMed Central journal article supplement (PMC5368050)

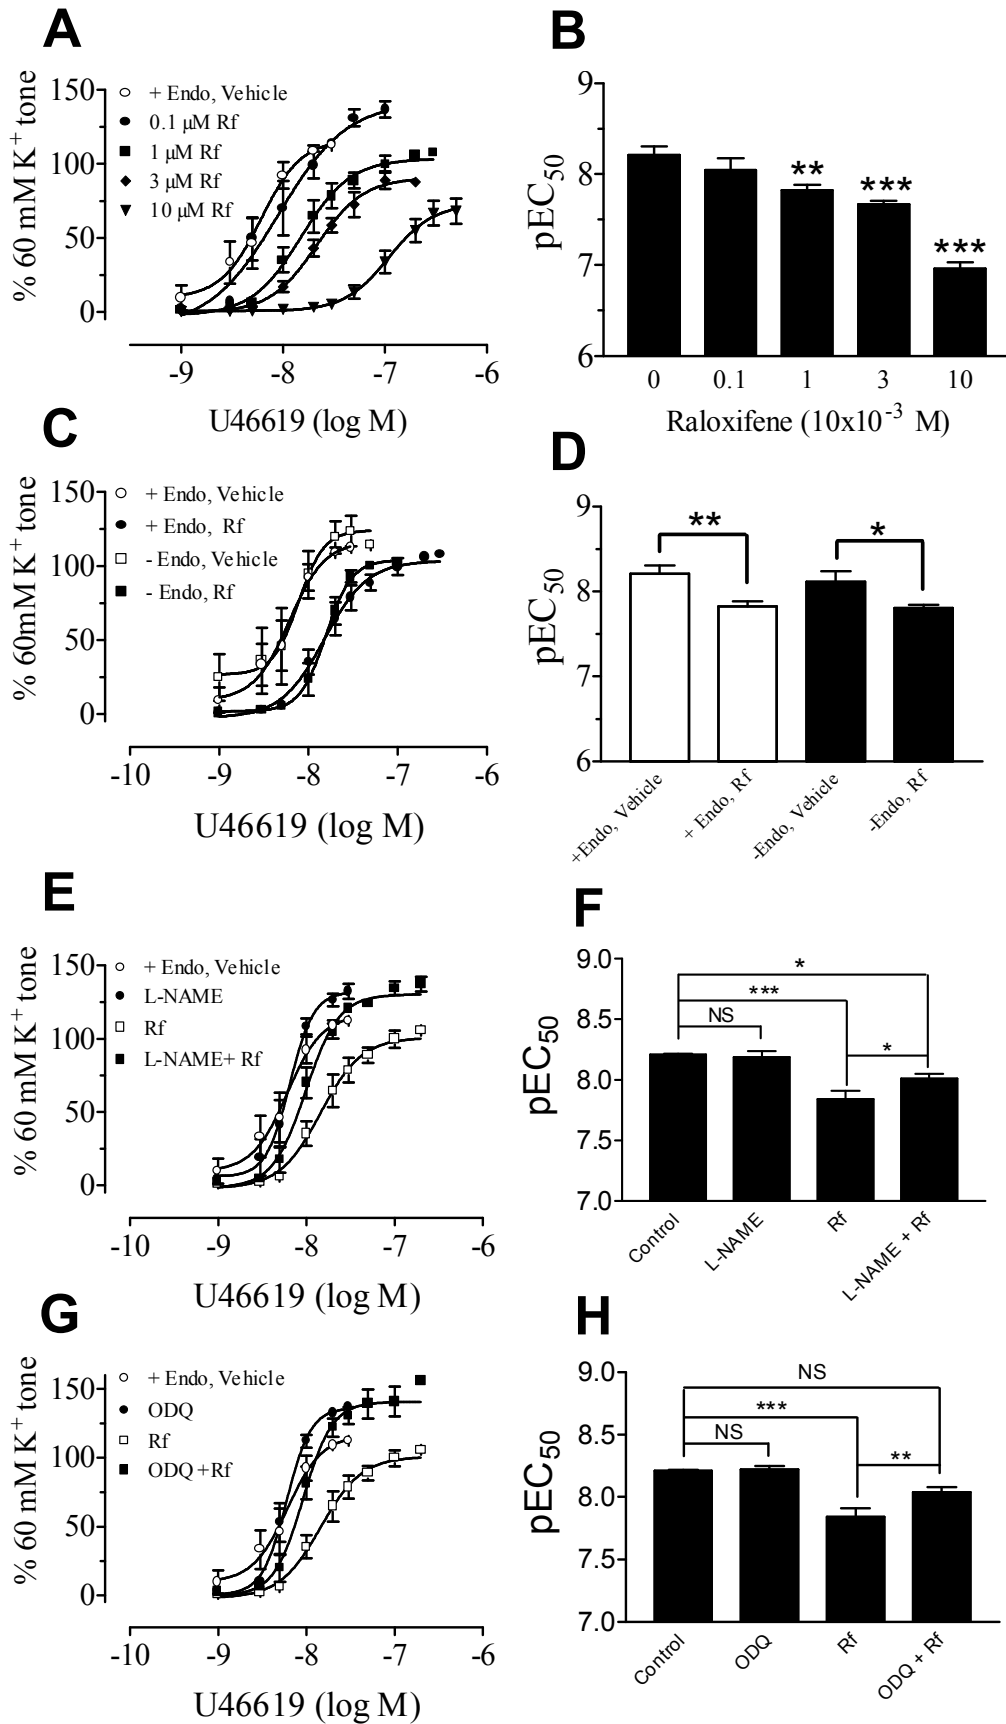

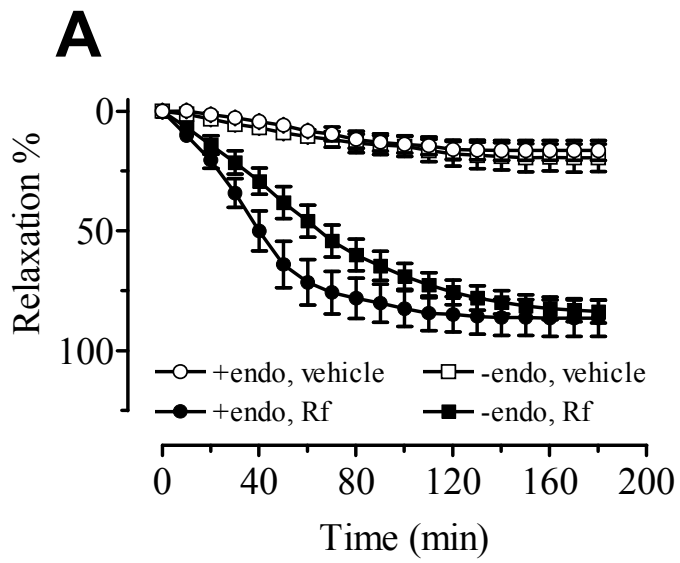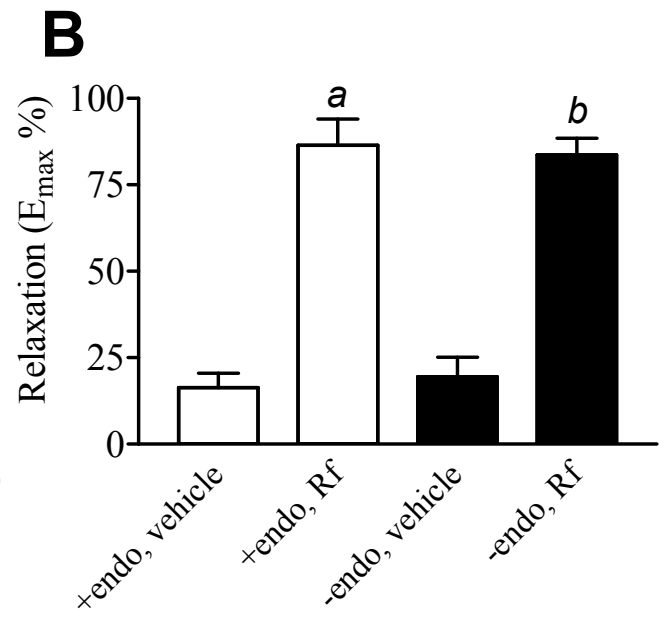

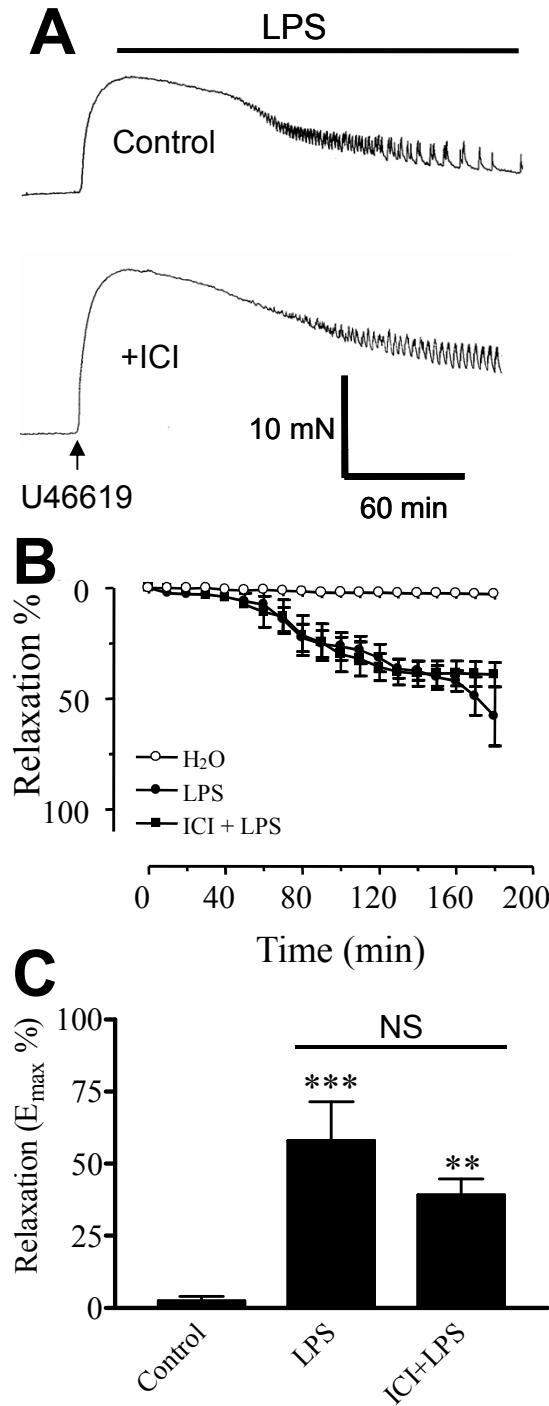

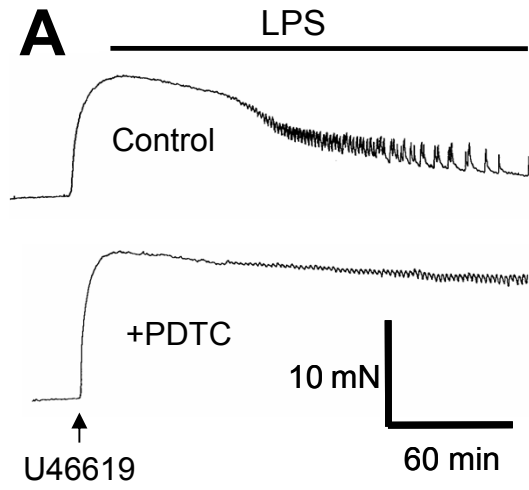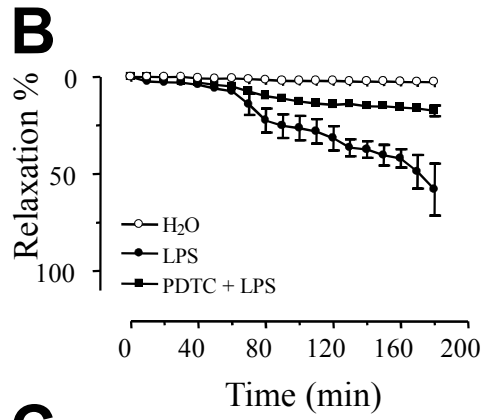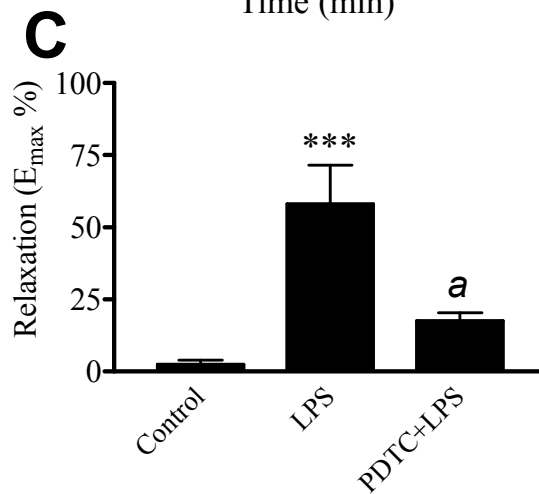

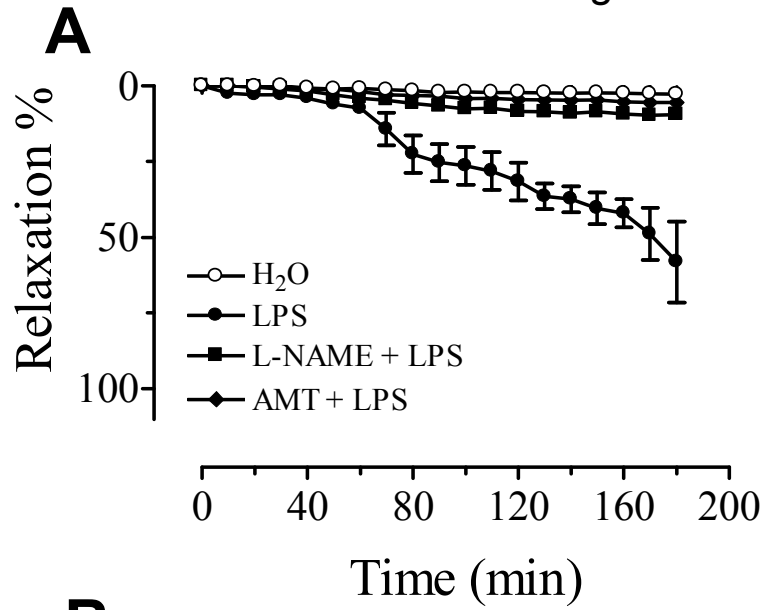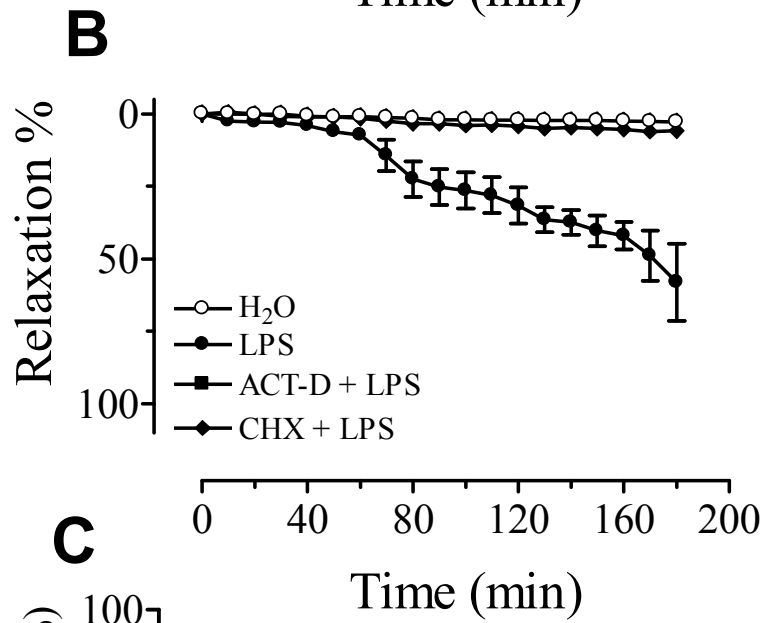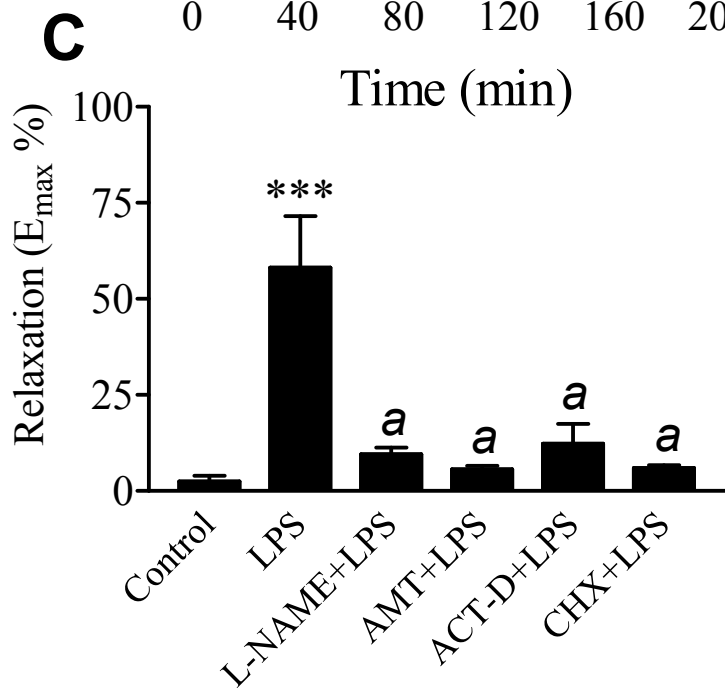

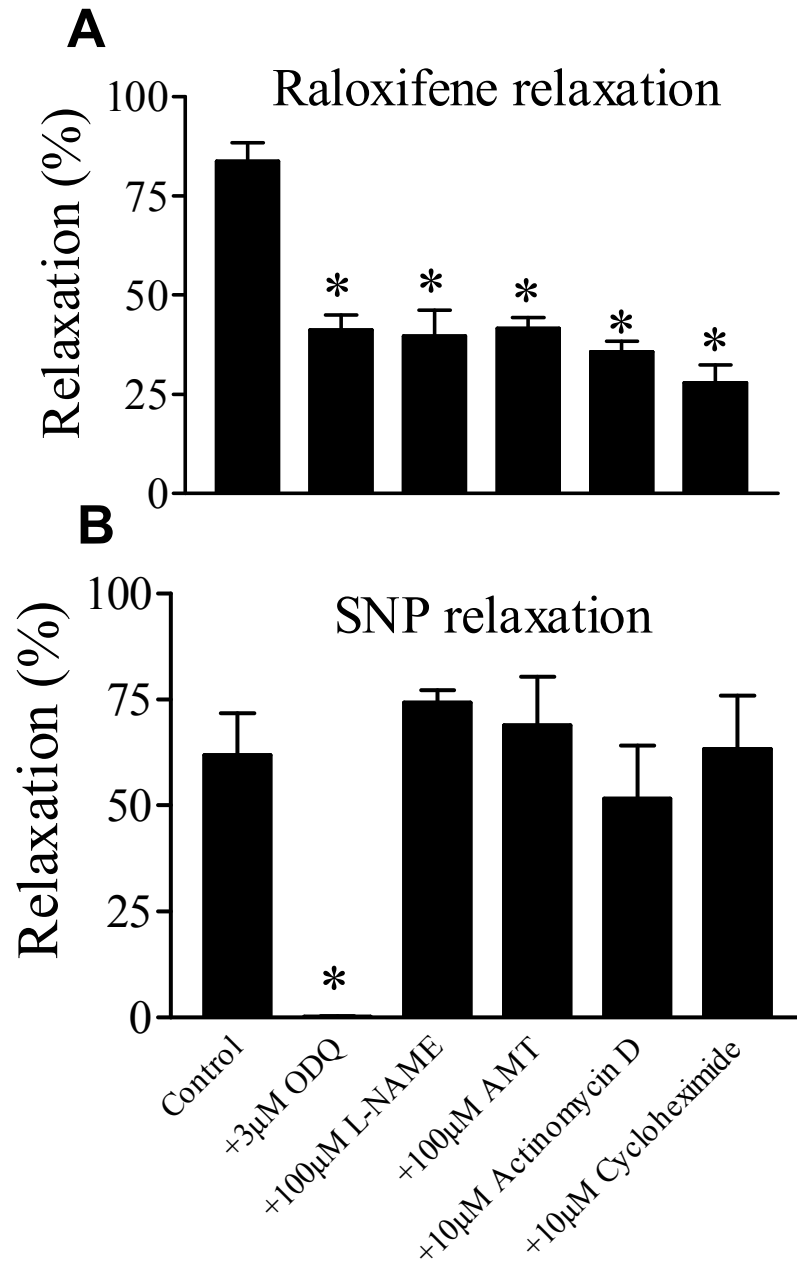

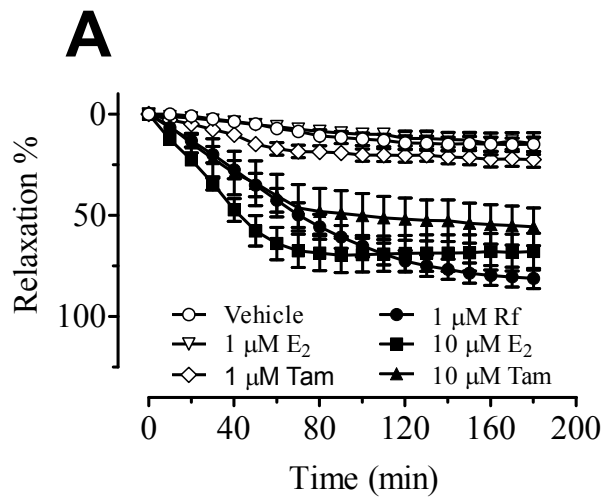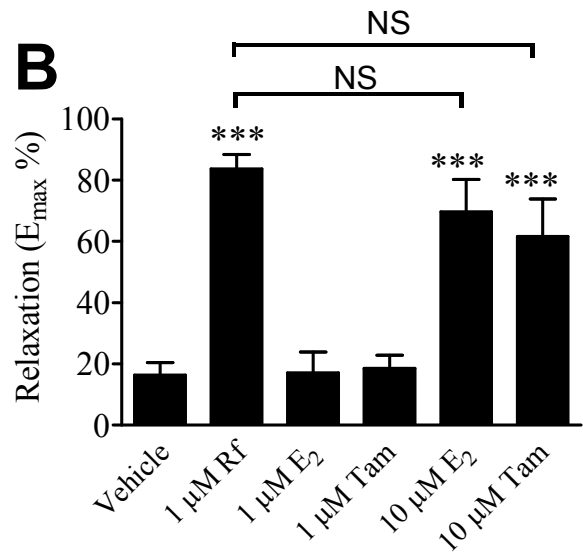

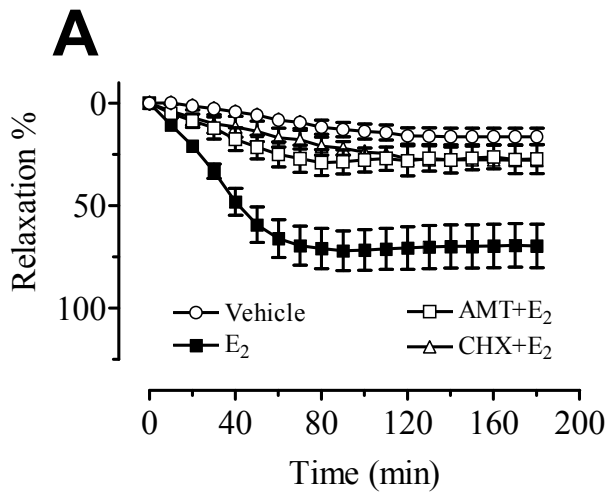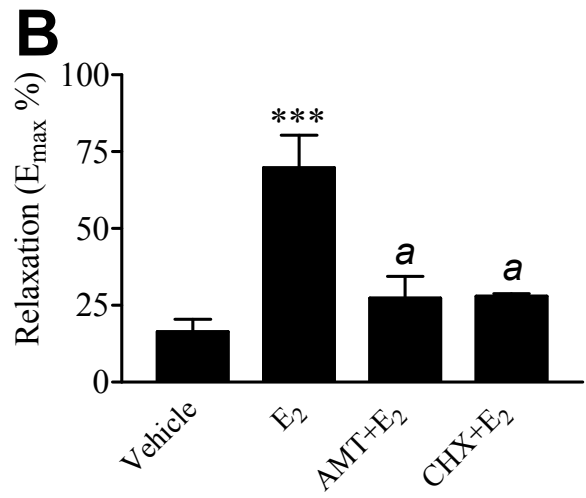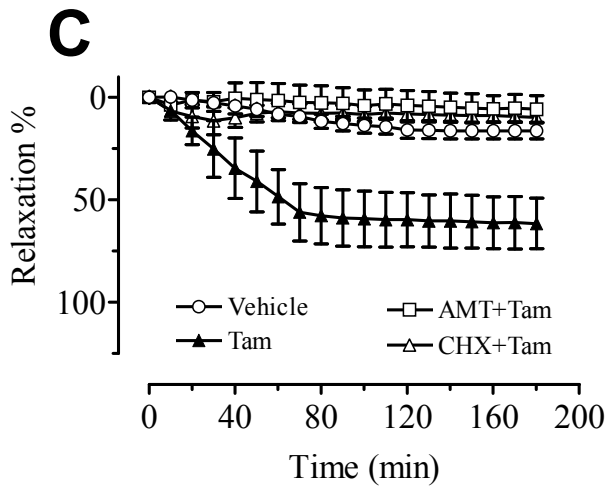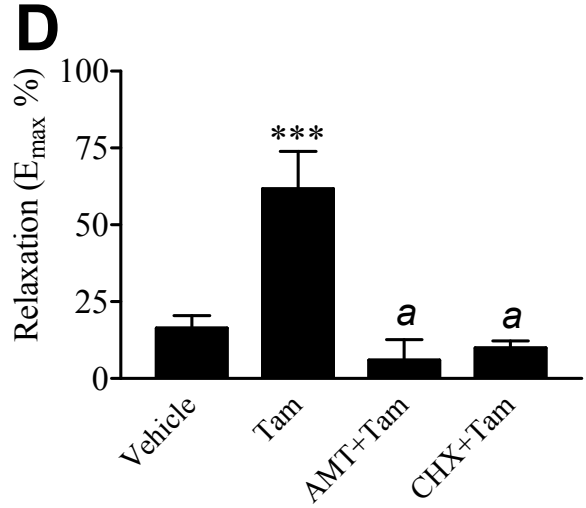

Supplement: BPH-174-718-s002.pdf [file BPH-174-718-s002.pdf]
